# Supplementary material
Source: Royal Society of Chemistry journal article supplement (doi:10.1039/d6nr00037a)
Supplement: d6nr00037a1.pdf [file d6nr00037a1.pdf]

## Supporting information

### Boron Doping in Carbon Layer: A Facile Strategy to Boost

#### Electrochemical Performance of $\text{Na}_2\text{FeTi}(\text{PO}_4)_3@C$

Ziyan Wang<sup>†</sup>, Zhilong Tan<sup>†</sup>, Yuening Zou, Rongzheng Zhang, Peng Zhou, Diye Wei, Zhifeng Huang, Hai Hu<sup>\*</sup>, Li Liu<sup>\*</sup>

*National Local Joint Engineering Laboratory for Key Materials of New Energy Storage Battery, Hunan Province Key Laboratory of Electrochemical Energy Storage and Conversion, Key Laboratory of Environmentally Friendly Chemistry and Applications of Ministry of Education, School of Chemistry, Xiangtan University, Xiangtan 411105, China*

---

<sup>†</sup> Corresponding author: These authors contributed equally to this work.

<sup>\*</sup>Corresponding author at: School of Chemistry, Xiangtan University, Xiangtan 411105, China. E-mail addresses: [huhai29@126.com](mailto:huhai29@126.com) (H. Hu), [liulili1203@126.com](mailto:liulili1203@126.com) (L. Liu).

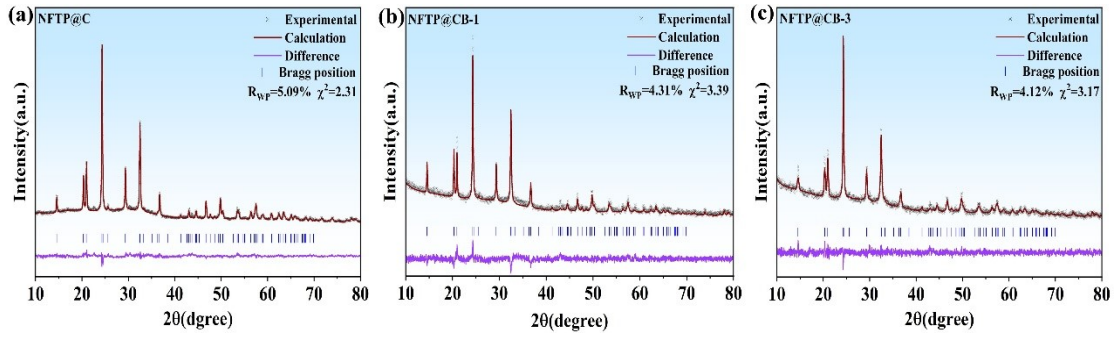

Figure S1. (a) Rietveld refinement of the XRD pattern for NFTP@C; (b) Rietveld refinement of the XRD pattern for NFTP@CB-1; (c) Rietveld refinement of the XRD pattern for NFTP@CB-3.

Table S1. Lattice parameters of NFTP@CB-x (x = 0,1,2,3).

|                     | NFTP@C   | NFTP@CB-1 | NFTP@CB-2 | NFTP@CB-3 |
|---------------------|----------|-----------|-----------|-----------|
| a=b (Å)             | 8.47871  | 8.48223   | 8.48925   | 8.49228   |
| c (Å)               | 21.78385 | 21.79746  | 21.81578  | 21.82556  |
| V (Å <sup>3</sup> ) | 1356.204 | 1358.178  | 1361.551  | 1363.152  |

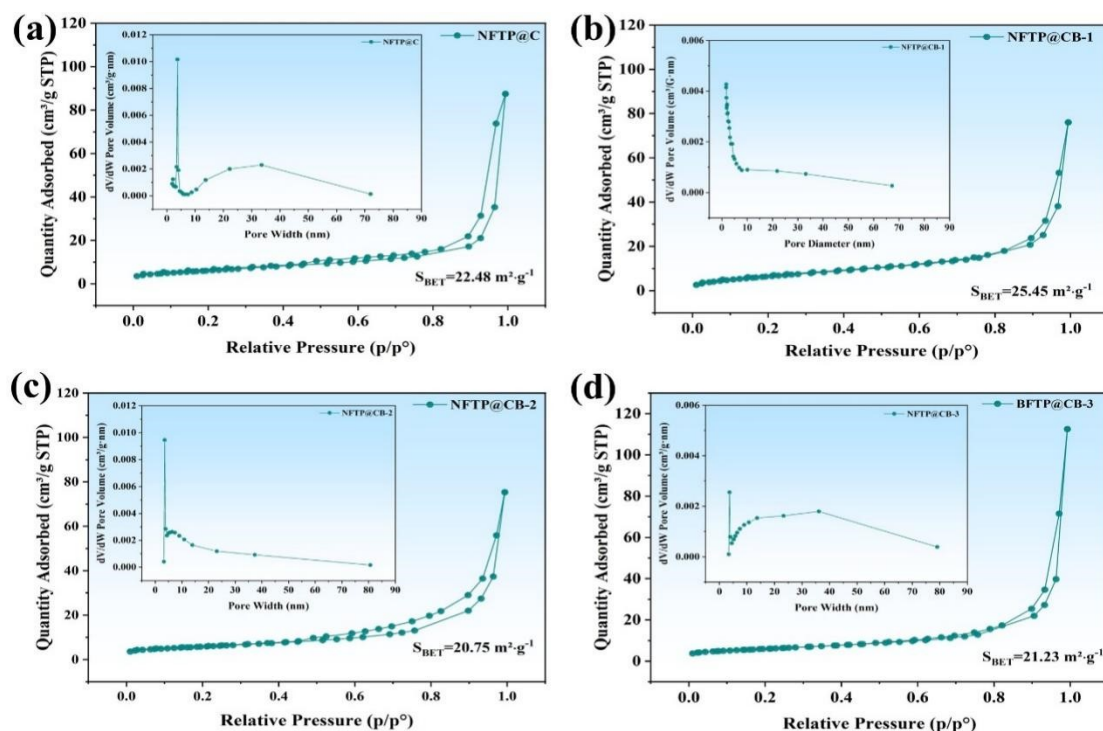

Figure S2. (a–d)  $N_2$  adsorption – desorption isotherms and pore size distribution plots of NFTP@CB-x ( $x = 0,1,2,3$ ) materials.

Table S2. (a–d)  $N_2$  adsorption – desorption isotherms and pore size distribution plots of NFTP@CB-x ( $x = 0,1,2,3$ ) materials.

| Samples   | BET surface area<br>( $m^2 g^{-1}$ ) | Pore volume<br>( $cm^3 g^{-1}$ ) | Pore diameter<br>(nm) |
|-----------|--------------------------------------|----------------------------------|-----------------------|
| NFTP@C    | 22.478                               | 0.135                            | 24.072                |
| NFTP@CB-1 | 25.447                               | 0.118                            | 18.489                |
| NFTP@CB-2 | 20.752                               | 0.117                            | 22.465                |
| NFTP@CB-3 | 21.232                               | 0.174                            | 32.79                 |

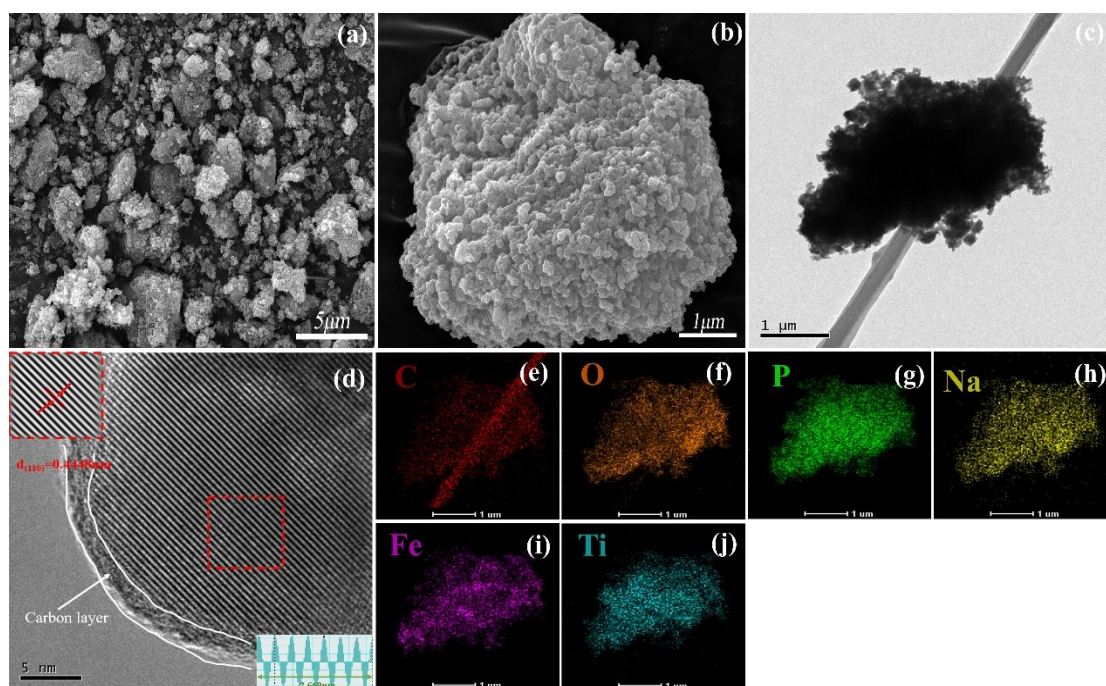

Figure S3. (a-c) SEM and TEM images of NFTP@C; (d) HRTEM image of NFTP@C; (e-j) EDS elemental mapping images of NFTP@C.

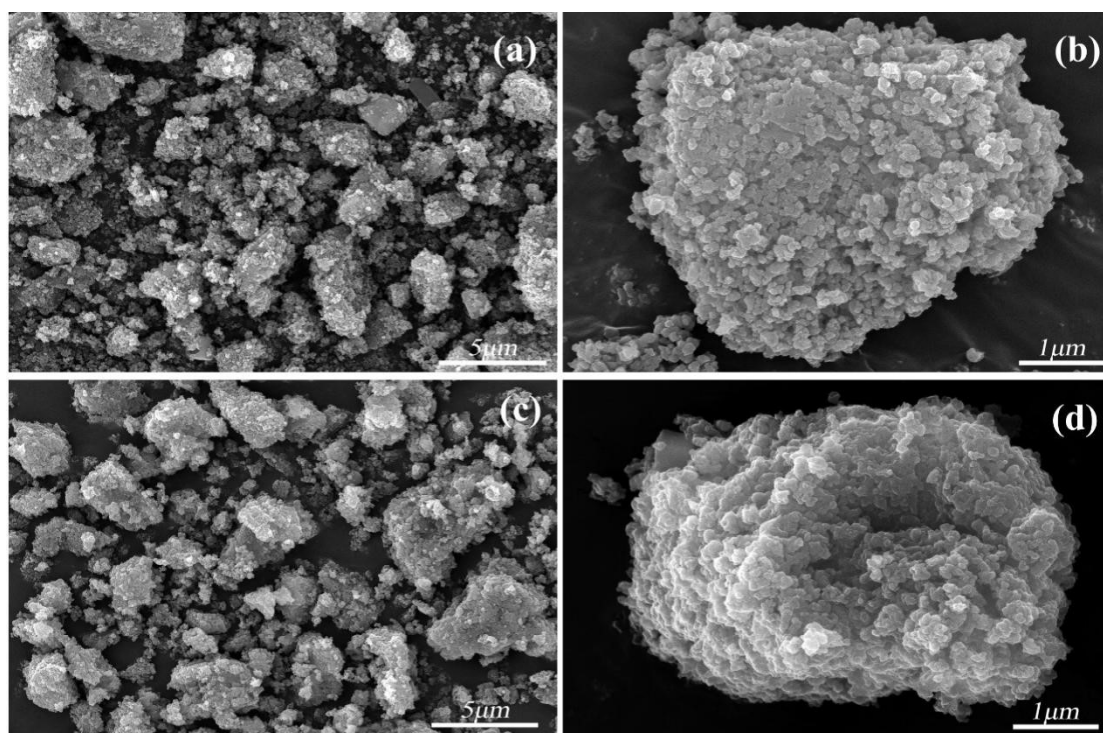

Figure S4. (a-b) SEM images of NFTP@CB-1; (c-d) SEM images of NFTP@CB-3.

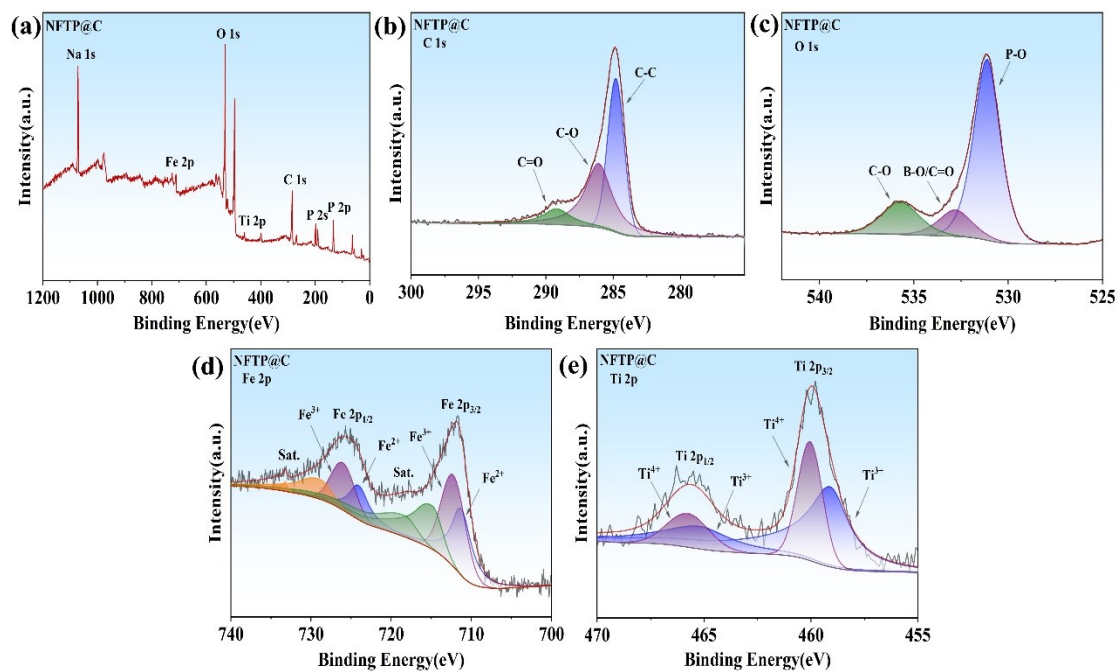

Figure S5. XPS spectra of NFTP@C: (a) survey spectrum; (b) high-resolution C 1s spectrum; (c) high-resolution O 1s spectrum; (d) high-resolution Fe 2p spectrum; (e) high-resolution Ti 2p spectrum.

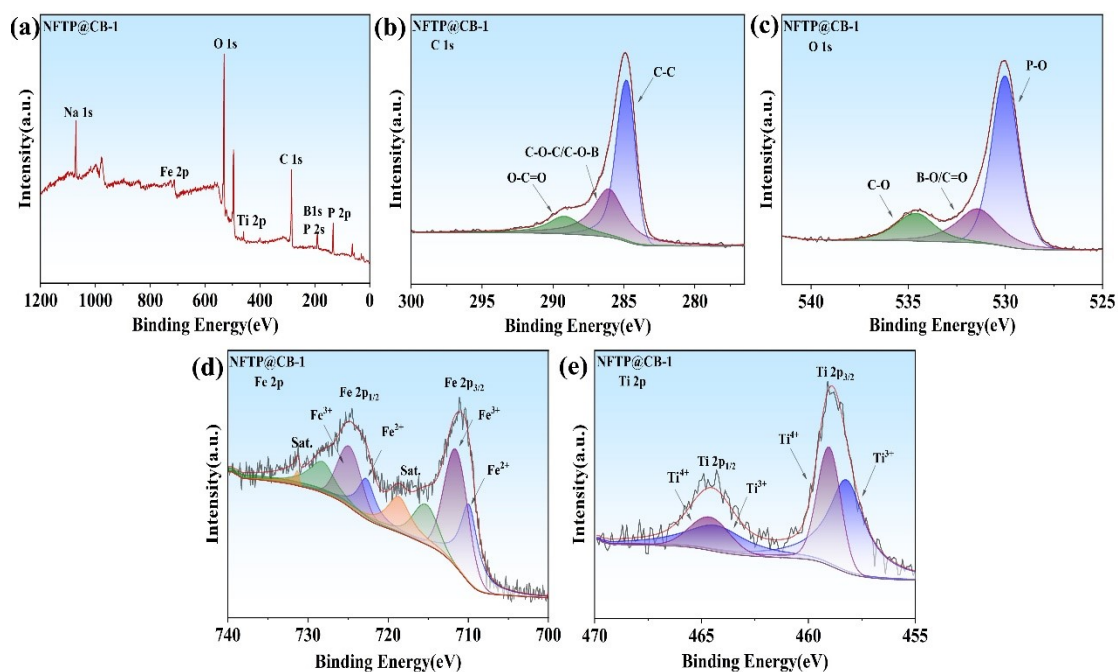

Figure S6. XPS spectra of NFTP@CB-1: (a) survey spectrum; (b) high-resolution C 1s spectrum; (c) high-resolution O 1s spectrum; (d) high-resolution Fe 2p spectrum; (e) high-resolution Ti 2p spectrum.

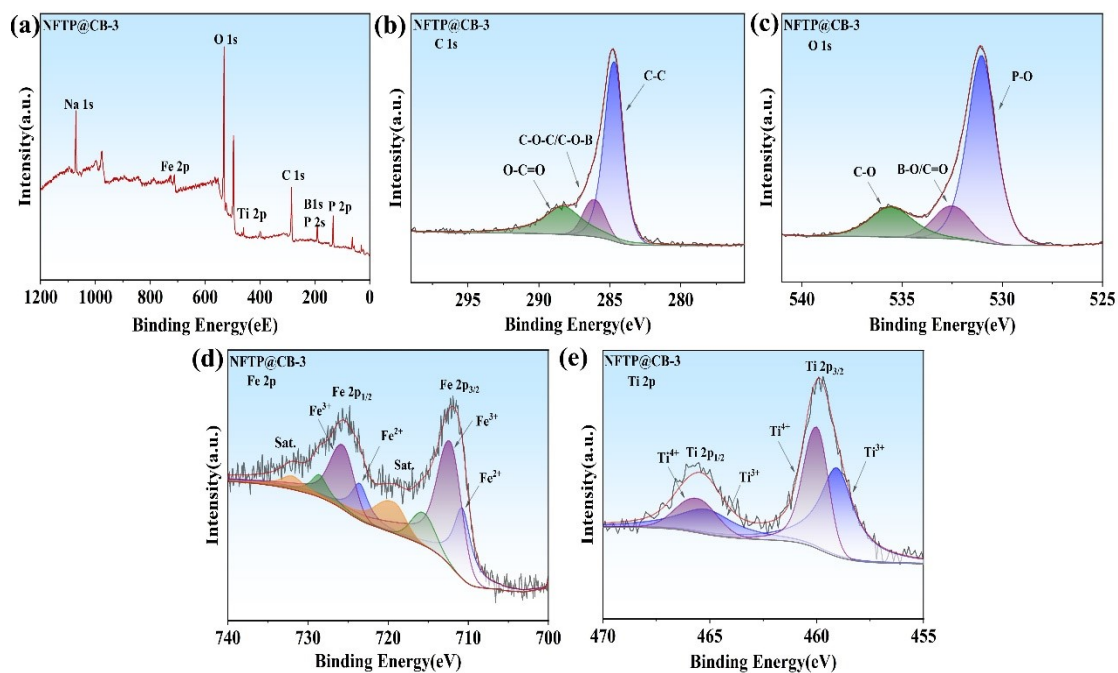

Figure S7. XPS spectra of NFTP@CB-3: (a) survey spectrum; (b) high-resolution C 1s spectrum; (c) high-resolution O 1s spectrum; (d) high-resolution Fe 2p spectrum; (e) high-resolution Ti 2p spectrum.

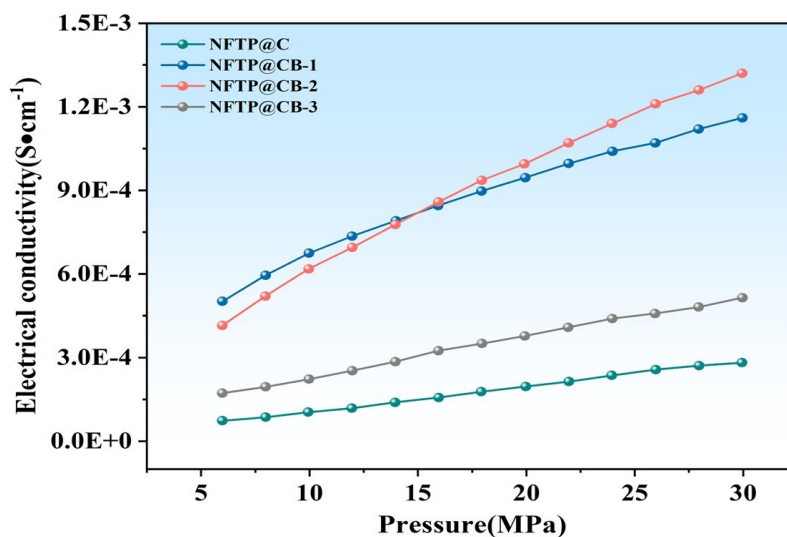

Figure S8. NFTP@CB-x (x=0,1,2,3) Four-probe measurement technique.

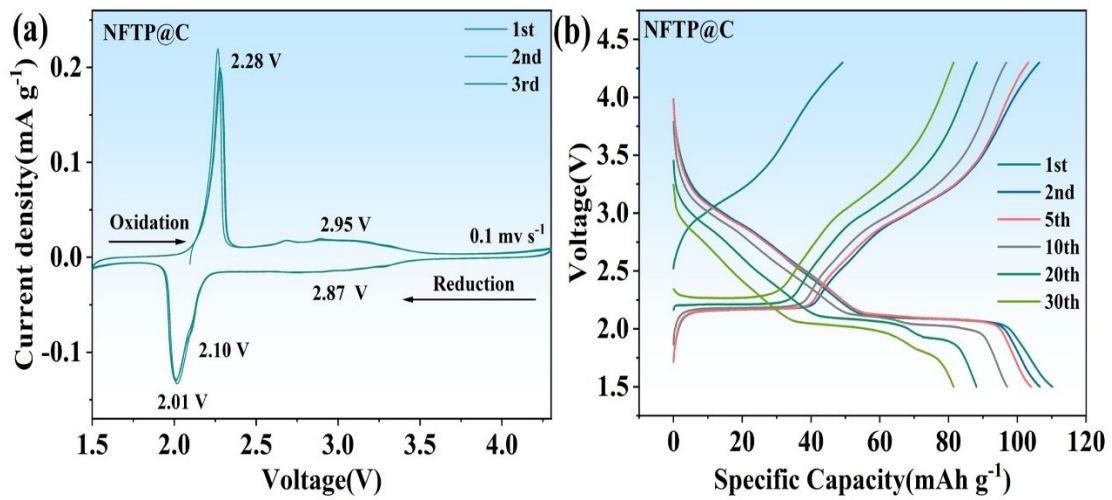

Figure S9. (a) CV curves of NFTP@C at a scan rate of  $0.1 \text{ mV s}^{-1}$ ; (b) GCD (galvanostatic charge - discharge) curves of NFTP@C at various current densities.

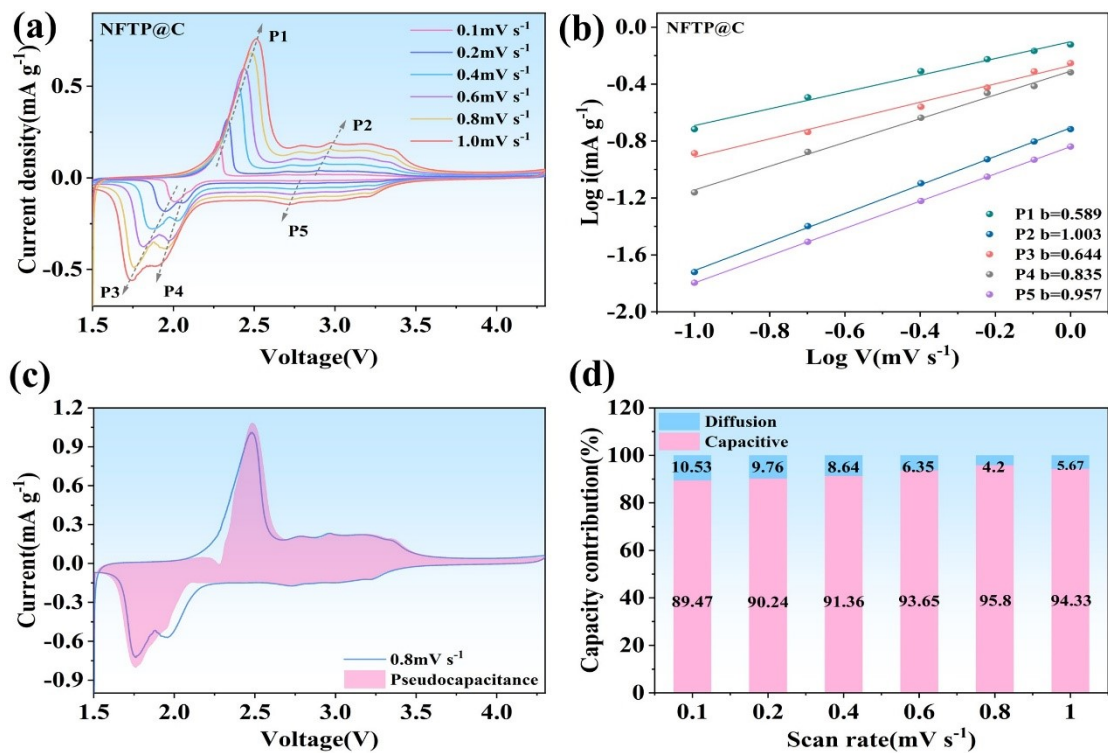

Figure S10. NFTP@C: (a) CV curves at various scan rates; (b) Linear relationship between  $\log i$  and  $\log v$  at different scan rates; (c) Pseudocapacitive contribution at  $0.8 \text{ mV s}^{-1}$ ; (d) Capacity contribution (%) of Diffusion and Capacitive components at various scan rates.

0.8 mV s<sup>-1</sup>; (d) Pseudocapacitive contribution ratios at different scan rates.

Table S3. The Rct and Rs values, as well as the Na<sup>+</sup> diffusion coefficients, of NFTP@CB-x (x = 0,1,2,3).

| Samples   | Rct (Ω) | Rs    | D <sub>Na<sup>+</sup></sub> (cm <sup>2</sup> S <sup>-1</sup> ) |
|-----------|---------|-------|----------------------------------------------------------------|
| NFTP@C    | 269.5   | 12.49 | 2.54 × 10 <sup>-17</sup>                                       |
| NFTP@CB-1 | 251.5   | 19.05 | 3.26 × 10 <sup>-17</sup>                                       |
| NFTP@CB-2 | 207.5   | 9.24  | 8.30 × 10 <sup>-17</sup>                                       |
| NFTP@CB-3 | 224.3   | 11.3  | 7.31 × 10 <sup>-17</sup>                                       |

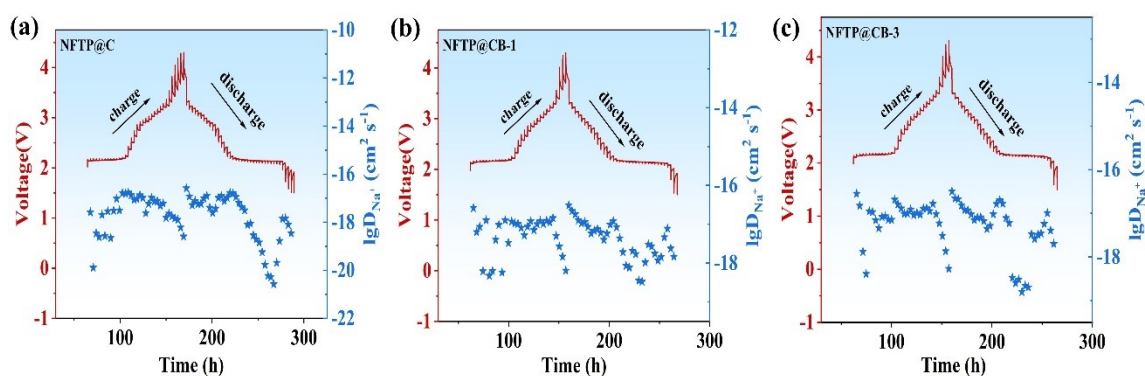

Figure S 11. NFTP@CB-x (x = 0,1,3): (a-c) GITT curves and the corresponding calculated log DNa<sup>+</sup> values.

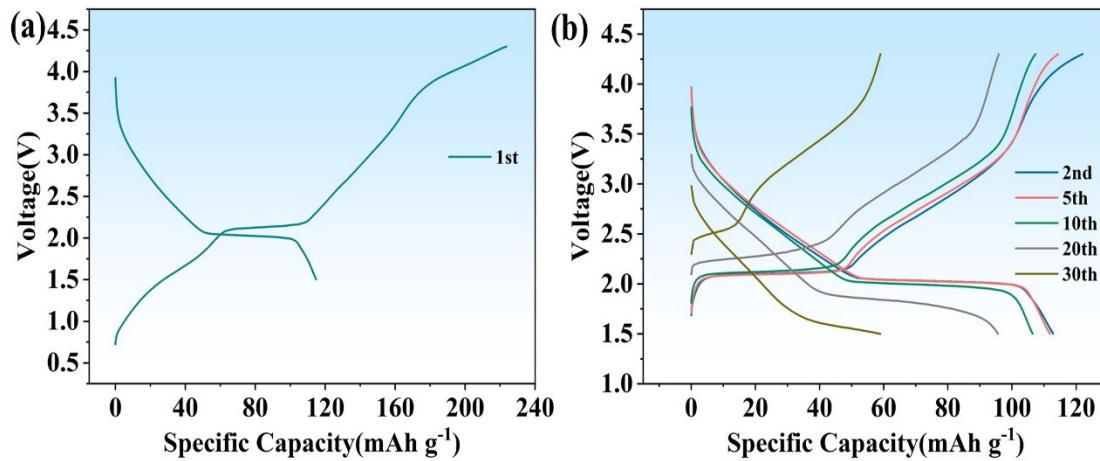

Figure S12. Galvanostatic charge–discharge (GCD) profiles of the NFTP@CB-2//HC full cell at various current densities: first cycle (a), and cycles 2, 5, 10, 20, and 30 (b).
